# Supplementary material
Source: PubMed Central journal article supplement (PMC5045760)
Supplement: NIHMS775492-supplement-03.pdf [file NIHMS775492-supplement-03.pdf]

## SUPPLEMENTAL MATERIAL

**Supplemental Table 1** Previous studies reporting fecal calprotectin in neonates with necrotizing enterocolitis.

| Year (Ref) | First Author | Country     | Study Design                                                                      | FCP with no NEC                     | FCP with medical NEC                     | FCP with surgical NEC                        | Conclusion                                                                                       |
|------------|--------------|-------------|-----------------------------------------------------------------------------------|-------------------------------------|------------------------------------------|----------------------------------------------|--------------------------------------------------------------------------------------------------|
| 2003 (10)  | Carroll      | England     | N=7 with NEC vs 7 controls                                                        | N= 7; 98 ±61 µg/g stool             | N= 7; 288 ±49 µg/g stool                 | NR                                           | FCP levels are higher in NEC (P=0.0006)                                                          |
| 2007 (13)  | Josefsson    | Sweden      | N=4 with NEC, 3 with perforation of other etiology vs 52 healthy preterm controls | N= 52; 253 µg/g stool               | N= 3; Mean 13298 (3646-22513) µg/g stool | N=1, 685 µg/g stool                          | FCP >2000 µg/g is a useful but not an early marker of NEC                                        |
| 2008 (14)  | Yang         | USA         | N=14 VLBW serial samples for first month                                          | 123±99 µg/g stool                   | 380±246 µg/g stool*                      | NR                                           | FCP may be a marker for early diagnosis of gastrointestinal illness                              |
| 2010 (15)  | Thuijls      | Netherlands | N=35 suspected of NEC                                                             | N=21; 69.6 (1-556.4) µg/g stool     | N=14; 589.2 (146.1-847.6) µg/g stool     | NR                                           | FCP is a promising diagnostic marker for NEC                                                     |
| 2012 (16)  | Aydemir      | Turkey      | N=25 with NEC and 25 controls                                                     | N=25; 365 (58-1006) µg/g stool      | N= 16; 1285 (241-2606) µg/g stool        | N= 9; 1251 (421-3337) µg/g stool             | FCP >792 µg/g stool has a 76% sensitivity and 92% specificity for identifying NEC                |
| 2012 (17)  | Dabritz      | Germany     | N= 145 (127 control and 18 with NEC). Stool samples alternate days for 4 weeks    | NR                                  | N=18; 349 (1-850) mg/kg                  | NR                                           | FCP levels are elevated at onset of NEC but not correlated with disease severity                 |
| 2012 (18)  | Zoppelli     | Germany     | N= 1988 stool samples from 206 VLBW neonates                                      | N= 38; Mean 52.7 µg/g stool         | N= 14 with moderate NEC. Mean NR.        | N=5 with fulminant NEC; Mean 14.4 µg/g stool | FCP is a sensitive and specific marker for NEC. However, FCP was unusually low in fulminant NEC. |
| 2012 (19)  | Selimoglu    | Turkey      | N=14 with NEC and 40 healthy preterm controls                                     | N= 40; 172±171 µg/mL                | N=14; 167.6±143 µg/mL                    | N=1; 420 µg/mL                               | FCP not useful in diagnosing NEC                                                                 |
| 2012 (20)  | Aydemir      | Turkey      | N=10 with NEC and 9 controls                                                      | N= 9; Mean 104 (Range 92-123) mg/dL | N=10; Mean 185 (Range 165-198) mg/dL     | NR                                           | FCP is a useful marker for diagnosis and severity of NEC                                         |
| 2012       | Reisinger    | Netherlands | N=62 with clinical suspicion of NEC                                               | N=19; 80 (1-625)                    | N=16; 402 (108-848)                      | NR                                           | FCP > 286 µg/g stool has an 81% sensitivity                                                      |

|              |           |             |                                                                       |                          |                                 |                                |                                                                                            |
|--------------|-----------|-------------|-----------------------------------------------------------------------|--------------------------|---------------------------------|--------------------------------|--------------------------------------------------------------------------------------------|
| (21)         |           |             |                                                                       | µg/g stool               | µg/g stool                      |                                | and 79% specificity for identifying NEC                                                    |
| 2013<br>(22) | Jenke     | Germany     | N= 68 ELBW neonates. Compared gut microbiota and FCP.                 | NR                       | NR                              | NR                             | No correlation between FCP level and total stool bacterial count of any analyzed bacteria. |
| 2014<br>(23) | Reisinger | Netherlands | N=29 with NEC (12 medical and 17 surgical or fatal)                   | NR                       | N= 12; 375 (146-848) µg/g stool | N=17; 479 (108-684) µg/g stool | FCP did not differentiate between medical vs surgical/fatal cases (p=0.87)                 |
| 2014<br>(24) | Yoon      | Korea       | N= 16 VLBW infants. Stools serially collected.                        | N=12; 4.34±1.94 mg/kg    | N= 4; 5.75±1.98 mg/kg           | NR                             | FCP higher in those with NEC (p=0.02)                                                      |
| 2014<br>(25) | Albanna   | Egypt       | N=15 with NEC and 20 controls                                         | N=20; 73±57 mg/dL        | N=12; 240±58 mg/dL              | N=3; 308±4 mg/dL               | FCP could be a valuable tool to investigate NEC (p<0.0001)                                 |
| 2015<br>(8)  | Bin-Num   | Israel      | N= 15 infants, 29 stool samples. Compared bedside FCP assay to ELISA. | 195 (110-440) µg/g stool | 3000 (2075-7875) µg/g stool     | NR                             | FCP useful for rapid diagnosis of NEC (p<0.0001)                                           |

Ref, reference number; FCP, fecal calprotectin; NEC, necrotizing enterocolitis; NR, not reported. FCP values were reported variably as “µg/g stool”, “mg/kg”, or “mg/dL”; \*infants were “sick” but not necessarily with a diagnosis of NEC.

**Supplemental Figure 1.** *Human NEC gastrointestinal tissue samples demonstrate NET formation.* (A) Using immunohistochemical techniques, we compared NET formation in gastrointestinal tissue samples collected from 5 different infants who underwent surgical treatment for NEC and 6 control infants operated on for indications other than NEC. Representative images from infants with NEC are shown in a 60x magnified image demonstrating PMNs and NETs. Calprotectin is seen in gold fluorescence. Neutrophil elastase, a protein known to be expressed on NETs, is seen in magenta fluorescence. Nuclear and NET-associated DNA is shown in blue fluorescence. White arrowheads denote NETs, and yellow arrowheads denote PMNs which express calprotectin. Bar, 10 $\mu$ m. (B, C) We quantified PMN (B) and NET formation (C) in the immunohistochemical images from infants with NEC represented in A and from control infants. 5 randomly selected high power fields were analyzed for each of the 5 NEC and 6 Control tissue samples. PMNs were defined as cells having neutrophil nuclear morphology and staining positive for both calprotectin and NE. NETs were defined as extracellular collections of DNA staining positive for both calprotectin and NE. \*\* denotes  $p < 0.001$ . We employed the student's T-test as a statistical tool.

**Supplemental Figure 2.** *LPS treatment fails to induce robust expression of calprotectin mRNA or protein.* (A) Using real-time RT-PCR, we quantified calprotectin and IL-8 mRNA expression in control and LPS-stimulated (100 ng/mL) adult PMNs. The y-axis represents LPS-induced mRNA expression shown as a fold change over baseline normalized to  $\beta$ -actin. Baseline mRNA expression is arbitrarily set at 1 (dashed line). Calprotectin mRNA expression (left column) was induced 1.8 fold by LPS while IL-8 mRNA (right column) was induced 8 fold as a control for PMN stimulation. (B) We used immunocytochemistry to qualitatively assess calprotectin protein expression in control and LPS-stimulated (100 ng/mL, 2 hours) PMNs. Representative images from LPS-stimulated PMNs are shown here. Calprotectin protein expression is shown in gold fluorescence. Nuclear DNA as a counterstain is shown in blue fluorescence. These images are representative of 3 separate experiments using PMNs isolated from 3 different healthy adult donors. Bar, 20 $\mu$ m.
